# Supplementary material for: Electrophysiological and Imaging Biomarkers to Evaluate Exercise Training in Patients with Neuromuscular Disease: A Systematic Review
Source: MDPI journal article supplement (doi:10.3390/jcm12216834), 2023-10-29
Supplement: s1 [file s1]

## Supplementary Materials

### A. Search strings

**Table S1.** Search string in PubMed

| Database        | PubMed                                                                                                                                                                                                                                                                                                                                                                                                                                                                                                            | 09-01-2023 |
|-----------------|-------------------------------------------------------------------------------------------------------------------------------------------------------------------------------------------------------------------------------------------------------------------------------------------------------------------------------------------------------------------------------------------------------------------------------------------------------------------------------------------------------------------|------------|
| #1 Participants | ("neuromuscular diseases"[MeSH Terms] OR "neuromuscular disease"[Title/Abstract] OR 'neuromuscular disorder'[Title/Abstract] OR 'polymyositis'[Title/Abstract] OR 'dermatomyositis'[Title/Abstract] OR 'mitochondrial myopathies'[Title/Abstract])                                                                                                                                                                                                                                                                | 345,286    |
| #2 Intervention | ("Exercise Therapy"[MeSH Terms] OR "exercise"[MeSH Terms] OR "exerci*"[Title/Abstract] OR "exercise training"[Title/Abstract] OR "Exercise Therapy"[Title/Abstract])                                                                                                                                                                                                                                                                                                                                              | 492,777    |
| #3 Outcome      | ("magnetic resonance spectroscopy"[MeSH Terms] OR "ultrasonography"[MeSH Terms] OR "magnetic resonance imaging"[MeSH Terms] OR "electromyography"[MeSH Terms] OR "spectroscopy, near infrared"[MeSH Terms] OR "MRI"[Title/Abstract] OR "MRS"[Title/Abstract] OR "EMG"[Title/Abstract] OR 'magnetic resonance spectroscopy'[Title/Abstract] OR 'magnetic resonance imaging'[Title/Abstract] OR 'electromyography'[Title/Abstract] OR 'ultrasound'[Title/Abstract] OR 'near infrared spectroscopy'[Title/Abstract]) | 1,608,184  |
|                 | #1 AND #2 AND #3                                                                                                                                                                                                                                                                                                                                                                                                                                                                                                  | 1,359      |
|                 | AND (humans[Filter])                                                                                                                                                                                                                                                                                                                                                                                                                                                                                              | 1,294      |
|                 | NOT 'review'                                                                                                                                                                                                                                                                                                                                                                                                                                                                                                      | 1,102      |
|                 | NOT 'Carpal Tunnel Syndrome'[Title/Abstract]                                                                                                                                                                                                                                                                                                                                                                                                                                                                      | 1,065      |
|                 | NOT 'Case report'                                                                                                                                                                                                                                                                                                                                                                                                                                                                                                 | 751        |

**Table S2.** Search string in EMBASE

| Database        | EMBASE                                                                                                                                                                                                                                                                                                                                                                                            | 09-01-2023 |
|-----------------|---------------------------------------------------------------------------------------------------------------------------------------------------------------------------------------------------------------------------------------------------------------------------------------------------------------------------------------------------------------------------------------------------|------------|
| #1 Participants | 'neuromuscular diseases'/exp OR 'neuromuscular disease':ab,ti OR 'neuromuscular disorder':ab,ti OR 'polymyositis':ab,ti OR 'dermatomyositis':ab,ti OR 'mitochondrial myopathies':ab,ti                                                                                                                                                                                                            | 251740     |
| #2 Intervention | 'kinesiotherapy'/exp OR 'exercise'/exp OR 'exerci*':ab,ti OR 'exercise training':ab,ti OR 'exercise therapy':ab,ti                                                                                                                                                                                                                                                                                | 646200     |
| #3 Outcome      | 'nuclear magnetic resonance spectroscopy'/exp OR 'echography'/exp OR 'nuclear magnetic resonance imaging'/exp OR 'electromyography'/exp OR 'near infrared spectroscopy'/exp OR 'mri':ab,ti OR 'mrs':ab,ti OR 'emg':ab,ti OR 'magnetic resonance spectroscopy':ab,ti OR 'magnetic resonance imaging':ab,ti OR 'electromyography':ab,ti OR 'ultrasound':ab,ti OR 'near-infrared spectroscopy':ab,ti | 2,574,171  |
|                 | #1 AND #2 AND #3                                                                                                                                                                                                                                                                                                                                                                                  | 1,945      |
|                 | NOT ('animal'/exp NOT 'human'/exp)                                                                                                                                                                                                                                                                                                                                                                | 1857       |
|                 | NOT 'review'                                                                                                                                                                                                                                                                                                                                                                                      | 1412       |
|                 | NOT 'case report'                                                                                                                                                                                                                                                                                                                                                                                 | 812        |

**Table S3.** Search string in CINAHL

| Database        | CINAHL                                                                                                                                                                                                                                                                                                                                                                                                                                                                                                      | 09-01-2023 |
|-----------------|-------------------------------------------------------------------------------------------------------------------------------------------------------------------------------------------------------------------------------------------------------------------------------------------------------------------------------------------------------------------------------------------------------------------------------------------------------------------------------------------------------------|------------|
| #1 Participants | MH neuromuscular disease OR TI neuromuscular disease OR AB neuromuscular disease OR TI neuromuscular disorder OR AB neuromuscular disorder OR TI polymyositis OR AB polymyositis OR TI dermatomyositis OR AB dermatomyositis OR TI mitochondrial myopathies OR AB mitochondrial myopathies                                                                                                                                                                                                                  | 4,629      |
| #2 Intervention | MH exercise training OR MH exercise OR TI exercise OR AB exercise OR TI exercise training OR AB exercise training OR TI Exercise Therapy OR AB Exercise Therapy                                                                                                                                                                                                                                                                                                                                             | 165,794    |
| #3 Outcome      | MH magnetic resonance imaging OR MH magnetic resonance spectroscopy OR MH electromyography OR MH echography OR MH near infrared spectroscopy OR TI MRI OR AB MRI OR TI MRS OR AB MRS OR TI EMG OR AB EMG OR OR TI magnetic resonance imaging OR AB magnetic resonance imaging OR TI magnetic resonance spectroscopy OR AB magnetic resonance spectroscopy OR TI electromyography OR AB electromyography OR TI ultrasound OR AB ultrasound OR TI near-infrared spectroscopy OR AB near-infrared spectroscopy | 278,973    |
|                 | #1 AND #2 AND #3                                                                                                                                                                                                                                                                                                                                                                                                                                                                                            | 34         |

1

2

3

4

5

6

Table S4. Search string in Cochrane

| Database        | Cochrane                                                                                                                                                                                     | 09-01-2023 |
|-----------------|----------------------------------------------------------------------------------------------------------------------------------------------------------------------------------------------|------------|
| #1 Participants | "neuromuscular disease" OR 'neuromuscular disorder' OR 'polymyositis' OR 'dermatomyositis' OR 'mitochondrial myopathies' in Title Abstract Keyword                                           | 136        |
| #2 Intervention | "exerci*" OR "exercise training" OR "Exercise Therapy" in Title Abstract Keyword                                                                                                             | 208        |
| #3 Outcome      | "MRI" OR "MRS" OR "EMG" OR 'magnetic resonance spectroscopy' OR 'magnetic resonance imaging' OR 'electromyography' OR 'ultrasound' OR 'near infrared spectroscopy' in Title Abstract Keyword | 355        |
|                 | #1 AND #2 AND #3                                                                                                                                                                             | 22         |

B. Quality Assessments

Table S5. NIH Pre-Post Quality Assessment

| First author et al. (Year) | 1 | 2 | 3  | 4  | 5  | 6 | 7 | 8  | 9 | 10 | 11 | 12 | Total Score | Quality Rating |
|----------------------------|---|---|----|----|----|---|---|----|---|----|----|----|-------------|----------------|
| Alexanderson (1999)        | Y | N | NR | NR | NR | N | N | NR | Y | Y  | N  | NA | 25%         | Poor           |
| Alexanderson (2000)        | Y | Y | N  | Y  | NR | N | N | NR | Y | Y  | N  | NA | 42%         | Poor           |
| El Mhandi (2007)           | Y | Y | Y  | Y  | NR | Y | Y | NR | Y | Y  | N  | NA | 67%         | Fair           |
| Lott (2021)                | Y | Y | Y  | N  | NR | Y | Y | NR | Y | Y  | N  | NA | 58%         | Fair           |
| Porcelli (2015)            | Y | Y | Y  | NR | NR | Y | Y | NR | Y | Y  | N  | NA | 58%         | Fair           |
| Spector (1996)             | Y | Y | Y  | Y  | NR | Y | N | NR | Y | Y  | N  | NA | 58%         | Fair           |
| Taivassalo (1998)          | Y | N | Y  | NR | NR | Y | Y | NR | Y | Y  | N  | NA | 50%         | Fair           |
| Taivassalo (2001)          | Y | N | Y  | NR | NR | Y | N | NR | Y | Y  | Y  | NA | 50%         | Fair           |
| Töllback (1999)            | Y | Y | Y  | Y  | NR | Y | Y | N  | N | Y  | N  | NA | 58%         | Fair           |
| Trenell (2005)             | Y | N | Y  | NR | NR | Y | Y | N  | Y | Y  | N  | NA | 50%         | Fair           |
| Westerberg (2018)          | Y | Y | Y  | Y  | NR | Y | Y | N  | Y | Y  | N  | NA | 67%         | Fair           |

Table S6. Cochrane ROB-2 Quality Assessment

| First author et al. Year | 1.1 | 1.2 | 1.3 | Risk          | 2.1 | 2.2 | 2.3 | 2.4 | 2.5 | 2.6 | Risk          |
|--------------------------|-----|-----|-----|---------------|-----|-----|-----|-----|-----|-----|---------------|
| Bulut (2022)             | Y   | Y   | Y   | Some concerns | Y   | N   | PY  | N   | Y   | N   | High          |
| Burns (2017)             | Y   | Y   | PN  | Low           | N   | Y   | Y   | N   | PN  | -   | Low           |
| Chung (2007)             | Y   | Y   | PN  | Low           | N   | N   | -   | N   | Y   | Y   | Some concerns |
| Janssen (2016)           | Y   | Y   | PN  | Low           | Y   | N   | PY  | N   | Y   | N   | High          |
| Rahbek (2016)            | Y   | Y   | N   | Low           | PY  | N   | PY  | N   | Y   | N   | High          |

| First author et al. | 3.1 | 3.2 | 3.3 | 3.4 | Risk | 4.1 | 4.2 | 4.3 | 4.4 | 4.5 | Risk | 5.1 | 5.2 | 5.3 | Risk | Overall Risk  |
|---------------------|-----|-----|-----|-----|------|-----|-----|-----|-----|-----|------|-----|-----|-----|------|---------------|
| Bulut               | N   | N   | Y   | Y   | High | N   | N   | N   | -   | -   | Low  | Y   | PN  | PN  | Low  | High          |
| Burns               | N   | PY  | -   | -   | Low  | PN  | N   | N   | -   | -   | Low  | Y   | PN  | PN  | Low  | Low           |
| Chung               | N   | PN  | PN  | -   | Low  | N   | N   | N   | -   | -   | Low  | Y   | PN  | PN  | Low  | Some concerns |
| Janssen             | N   | PN  | PN  | -   | Low  | N   | PN  | N   | -   | -   | Low  | PY  | PN  | PN  | Low  | High          |
| Rahbek              | N   | PN  | PN  | -   | Low  | N   | PN  | N   | -   | -   | Low  | PY  | PN  | PN  | Low  | High          |

Table S7. Cochrane ROBINS-1 Quality Assessment

| First author et al. Year | 1.1 | 1.2 | 1.3 | 1.4 | 1.5 | 1.6 | 1.7 | 1.8 | Risk    | 2.1 | 2.2 | 2.3 | 2.4 | 2.5 | Risk |
|--------------------------|-----|-----|-----|-----|-----|-----|-----|-----|---------|-----|-----|-----|-----|-----|------|
| Taivassalo (1999)        | Y   | N   | -   | PN  | -   | N   | -   | -   | Serious | N   | -   | -   | Y   | -   | Low  |

| First author et al. | 3.1 | 3.2 | 3.3 | Risk | 4.3 | 4.4 | 4.5 | 4.6 | Risk | 5.1 | 5.2 | 5.3 | 5.4 | 5.5 | Risk |
|---------------------|-----|-----|-----|------|-----|-----|-----|-----|------|-----|-----|-----|-----|-----|------|
| Taivassalo          | Y   | Y   | N   | Low  | NI  | Y   | Y   | -   | Low  | PY  | N   | N   |     |     | Low  |

| First author et al. | 6.1 | 6.2 | 6.3 | 6.4 | Risk    | 7.1 | 7.2 | 7.3 | Risk    | Overall Risk |
|---------------------|-----|-----|-----|-----|---------|-----|-----|-----|---------|--------------|
| Taivassalo          | Y   | Y   | Y   | NI  | Serious | N   | Y   | PN  | Serious | Serious      |

### C. Functional measure outcomes

**Table S8.** Baseline and follow-up measurement functional tests

| Study                    | NMD                      | Endurance / Resistance functional test            | Functional Test                                                                                                                                                                                            | Baseline                                                              | After intervention                                                                                                                                                                                            |
|--------------------------|--------------------------|---------------------------------------------------|------------------------------------------------------------------------------------------------------------------------------------------------------------------------------------------------------------|-----------------------------------------------------------------------|---------------------------------------------------------------------------------------------------------------------------------------------------------------------------------------------------------------|
| <b>Mhandi [40]</b>       | CMT                      | Endurance + Resistance<br>Resistance<br>Endurance | Functional time-scored activity e.g., descending stair<br>Isokinetic muscle strength (Nm) knee extension/flexion<br>Cardiorespiratory cycle test ( $VO_2$ peak, $P_{max}$ , $HR_{max}$ , $Lactate_{max}$ ) | $-5.5 \pm 0.9$ s                                                      | <b>Significant improvement except for 1/6 activity (<math>p &lt; 0.002 - 0.007</math>)</b><br><b><math>p = 0.03</math> and <math>p = 0.003</math>.</b><br><br><b><math>p = 0.02, 0.003, 0.24, 0.11</math></b> |
| <b>Burns [32]</b>        | CMT                      | Endurance<br>Resistance<br>Endurance + Resistance | CMTpedS Score (0 - 44)<br>Strength dorsiflexion<br>Gait (foot drop, ankle power at push off, knee flexion in swing, hip flexion in swing)                                                                  | $13 \pm 7$ / $13 \pm 7$ (resistive/sham group resp.)                  | $13 \pm 7$ / $12 \pm 9$ (resistive/sham group resp.) $p = 0.84$<br><br><b><math>p = 0.041</math></b><br>$p = 0.81, 0.70, 0.98, 0.18$                                                                          |
| <b>Alexanderson [34]</b> | PM and DM                | Endurance<br>Endurance                            | Functional index in myositis (0 - 64)<br>Walking distance                                                                                                                                                  | Right side - 48.5 (32-64)<br>Left side - 47.5 (28-63)<br>312 (81-422) | <b>Right side - 57 (41-64) (<math>p &lt; 0.05</math>)</b><br><b>Left side - 57 (42-63) (<math>p &lt; 0.05</math>)</b><br><b>404 (124-549) (<math>p &lt; 0.05</math>)</b>                                      |
| <b>Alexanderson [35]</b> | PM and DM                |                                                   | Functional index in myositis (0 - 64)                                                                                                                                                                      | right side - 52 (32-62)<br>left side - 50 (33-62)                     | <b>Functional index significantly improved (<math>p &lt; 0.05</math> right, <math>p &lt; 0.01</math> left)</b>                                                                                                |
| <b>Chung [31]</b>        | PM and DM (only control) | Endurance<br>Resistance<br>Resistance             | Functional index in myositis<br>AFPT scores<br>Strength individual muscles                                                                                                                                 | $46.3$ (36.0-53.4)<br><br>$30$ (24-414) s                             | <b><math>51.8</math> (38.4-57.3) (<math>p = 0.015</math>)</b><br><br>Not significant<br>Not significant                                                                                                       |
| <b>Taivassalo [44]</b>   | MM                       | Endurance<br>Endurance                            | Aerobic capacity<br>Exercise tolerance                                                                                                                                                                     | $4.39 \pm 1.55$ METs<br>$12.3 \pm 6$ min                              | <b><math>5.79 \pm 1.72</math> METs (<math>p &lt; 0.01</math>)</b><br><b><math>16.2 \pm 7.0</math> min (<math>p &lt; 0.02</math>)</b>                                                                          |
| <b>Taivassalo [33]</b>   | MM and NMM               | Endurance                                         | Aerobic capacity (METs)                                                                                                                                                                                    | MM: $4.6 \pm 1.6$<br>NMM: $4.9 \pm 1.4$                               | <b>MM: <math>5.9 \pm 1.9</math> (<math>p &lt; 0.01</math>)</b><br><b>NMM: <math>5.67 \pm 1.7</math> (<math>p &lt; 0.01</math>)</b>                                                                            |

18  
19  
20  
21

|                                     |            |                        |                                                                                                                          |                                                            |                                                                                                                                                                                                                                         |
|-------------------------------------|------------|------------------------|--------------------------------------------------------------------------------------------------------------------------|------------------------------------------------------------|-----------------------------------------------------------------------------------------------------------------------------------------------------------------------------------------------------------------------------------------|
| <b>Taivassalo [38]</b>              | MM         | Endurance              | Cardiorespiratory cycle test (Work capacity, VO <sub>2</sub> , Cardiac output, a-vO <sub>2</sub> , ΔQ/ΔVO <sub>2</sub> ) | 45 ± 21 watts                                              | <b>59 ± 27 watts (p &lt; 0.05)</b><br><b>Work capacity, VO<sub>2</sub> and a-vO<sub>2</sub> significant,</b><br>Cardiac output and ΔQ/ΔVO <sub>2</sub> non-significant                                                                  |
| <b>Trenell [39]</b>                 | MM         | Endurance<br>Endurance | 6MWT<br>Progressive exercise test (MHRR VO <sub>2</sub> , oxygen uptake efficiency slope, Peak Watts)                    | 508 ± 142 m                                                | <b>555 ± 118 m (p &lt; 0.05)</b><br><b>Oxygen uptake efficiency slope and peak watts significant (p &lt; 0.05),</b> MHRR VO <sub>2</sub> non-significant.                                                                               |
| <b>Porcelli [41]</b>                | MM and McA | Endurance + Resistance | Incremental exercise test (Peak work rate (W))                                                                           | MM: 72 ± 13<br>McA: 73 ± 13                                | <b>MM: 88 ± 15 (p &lt; 0.05)</b><br><b>McA: 89 ± 12 (p &lt; 0.05)</b>                                                                                                                                                                   |
|                                     |            | Endurance              | Low-intensity constant work rate exercise test (work rate (%W <sub>peak</sub> ))                                         | MM: 54 ± 5<br>McA: 59 ± 5                                  | <b>MM: 45 ± 6 (p &lt; 0.05)</b><br><b>McA: 48 ± 4 (p &lt; 0.05)</b>                                                                                                                                                                     |
| <b>Rahbek [29]</b>                  | MG         | Endurance + Resistance | 6MWT, STS, B&B, and SCT                                                                                                  | PRT: 527 ± 100 m<br>ET: 617 ± 96 m                         | PRT: 6MWT (562 ± 82 m, p = 0.08), <b>STS (p = 0.04),</b><br><b>B&amp;B<sub>dominant</sub> (p = 0.01),</b> SCT (p = 0.08)<br>ET: 6MWT (624 ± 95, p = 0.60), <b>STS (p = 0.04),</b><br>B&B <sub>dominant</sub> (p = 0.56), SCT (p = 0.23) |
|                                     |            | Resistance             | Isokinetic strength                                                                                                      |                                                            | <b>PRT: knee extensor (p = 0.02) and shoulder abductor (p = 0.05) significant</b><br>AT: non-significant                                                                                                                                |
|                                     |            | Endurance + Resistance | QMG                                                                                                                      | PRT: 5.5 (2-14)<br>ET: 6.5 (0-17)                          | PRT: 4.5 (4 - 8), p = 0.50<br>ET: 4.5 (0 - 22), p = 0.65                                                                                                                                                                                |
| <b>Westerberg [42]</b>              | MG         | Endurance + Resistance | TUG, 12MWT, 30SCST, Jamar                                                                                                | n.a.                                                       | <b>30SCST median change +2 (p = 0.0039),</b> TUG, 12MWT and Jamar non-significant change (p > 0.05).                                                                                                                                    |
|                                     |            | Endurance + Resistance | QMG & MGC                                                                                                                |                                                            | Median QMG change from 3 to 1 (p > 0.05) and <b>median MGC change from 3 to 2 (p = 0.043)</b>                                                                                                                                           |
|                                     |            | Resistance             | Isometric muscle force                                                                                                   | Quadriceps: 25.2 ± 4.4 kg<br>Biceps brachii: 21.0 ± 6.0 kg | <b>Quadriceps: 30.2 ± 3.8 kg (p = 0.014)</b><br>Biceps brachii: 21.9 ± 5.6 kg (p = 0.58)                                                                                                                                                |
| <b>Janssen [17, 23]<sup>1</sup></b> | FSHD1      | Endurance              | 6MWT                                                                                                                     | ET: 388 (136-630) m/ UC: 436 (80-708) m                    | ET: 420 (159 - 605) m / UC: 430 (90 - 800)                                                                                                                                                                                              |
| <b>Lott [43]</b>                    | DMD        | Endurance + Resistance | 4-stair ascent / descent:                                                                                                | 3.7 s up and 3.4 s down                                    | + 13.5% up (p = 0.09) and + <b>22.7% down (p &lt; 0.05)</b>                                                                                                                                                                             |
|                                     |            | Resistance             | Peak isometric strength (peak torque)                                                                                    | 45 Nm knee extensors and 49 Nm knee flexors                | + <b>20.6% for knee extensors (p &lt; 0.01) and 14.3% for knee flexors (p &lt; 0.05)</b>                                                                                                                                                |
| <b>Bulut [30]</b>                   | DMD        | Endurance              | 6MWT                                                                                                                     | 395.3 ± 46.6 m / control: 421.7 ± 64.4 m                   | <b>413.0 ± 52.3 m / control: 393.8 ± 68.2 m (p &lt; 0.001)</b>                                                                                                                                                                          |
|                                     |            | Endurance + Resistance | Motor function measure                                                                                                   | 83.2 ± 6.1 / control: 82.3 ± 10.2                          | <b>86.9 ± 4.0 / control: 80.4 ± 9.4 (p = 0.006)</b>                                                                                                                                                                                     |
| <b>Spector [36]</b>                 | PPMA       | Resistance             | 3RM test                                                                                                                 | n.a.                                                       | + <b>41 ± 16 % for leg press, + 61 ± 50% for knee extension exercises, + 54 ± 8 % for arm press and +71 ± 18 % for arm extension exercises (p &lt; 0.05)</b>                                                                            |

|               |    |                                                                                                                                                                       |          |               |                            |    |
|---------------|----|-----------------------------------------------------------------------------------------------------------------------------------------------------------------------|----------|---------------|----------------------------|----|
| Tollbäck [37] | MD | Resistance                                                                                                                                                            | 1RM test | 16.4 ± 3.4 kg | 21.8 ± 2.6 kg (p = 0.0002) |    |
|               |    | <b>Bold</b> is a significant difference between baseline and end intervention.                                                                                        |          |               |                            | 22 |
|               |    | <sup>1</sup> Results of the functional test have only been reported in another study [17].                                                                            |          |               |                            | 23 |
|               |    | <sup>2</sup> between group (intervention vs control) comparison p-value (p < 0.05 is significant).                                                                    |          |               |                            | 24 |
|               |    | Abbreviations: NMD = neuromuscular disease; CMT = Charcot-Marie-Tooth disease; PM = Polymyositis; DM = dermatomyositis; MM =                                          |          |               |                            | 25 |
|               |    | Mitochondrial myopathy; NMM = chronic nonmetabolic myopathies; McA = McArdle disease; MG = Myasthenia Gravis; FSHD1 =                                                 |          |               |                            | 26 |
|               |    | Facioscapulohumeral muscular dystrophy type 1; DMD = Duchenne Muscular Dystrophy; PPMA = postpolio muscular atrophy; MD = myotonic                                    |          |               |                            | 27 |
|               |    | dystrophy; VO <sub>2 peak</sub> = maximal oxygen consumption; P <sub>max</sub> = maximum power; HR <sub>max</sub> = maximum heart rate; CMTPedS = Charcot-Marie-Tooth |          |               |                            | 28 |
|               |    | disease Pediatric Scale; AFPT = aggregate functional performance time; METs = metabolic equivalents; a-vO <sub>2</sub> = arteriovenous oxygen uptake; Q =             |          |               |                            | 29 |
|               |    | cardiac output; 6MWT = 6-minute walk test; STS = 30s sit to stand test; B&B = box and block test; SCT = stair climb test; MHRR = maximum heart                        |          |               |                            | 30 |
|               |    | rate reserve; TUG = Timed Up and Go; 12MWT = 12-minute walk test ; 30SCST = 30-second Chair Stand Test; Jamar = handgrip strength test; QMG                           |          |               |                            | 31 |
|               |    | = Quantitative Myasthenia Gravis score; MGC = Myasthenia Gravis composite; 3RM = three repetition maximum; 1RM = one repetition maximum;                              |          |               |                            | 32 |
|               |    | PRT = progressive resistance training; ET = endurance training; UC = usual care.                                                                                      |          |               |                            | 33 |
|               |    |                                                                                                                                                                       |          |               |                            | 34 |
|               |    |                                                                                                                                                                       |          |               |                            | 35 |
